# Supplementary material for: Noise and Robustness in Phyllotaxis
Source: PLOS journal article supplement (doi:10.1371/journal.pcbi.1002389), 2012-02-16

Figure S1

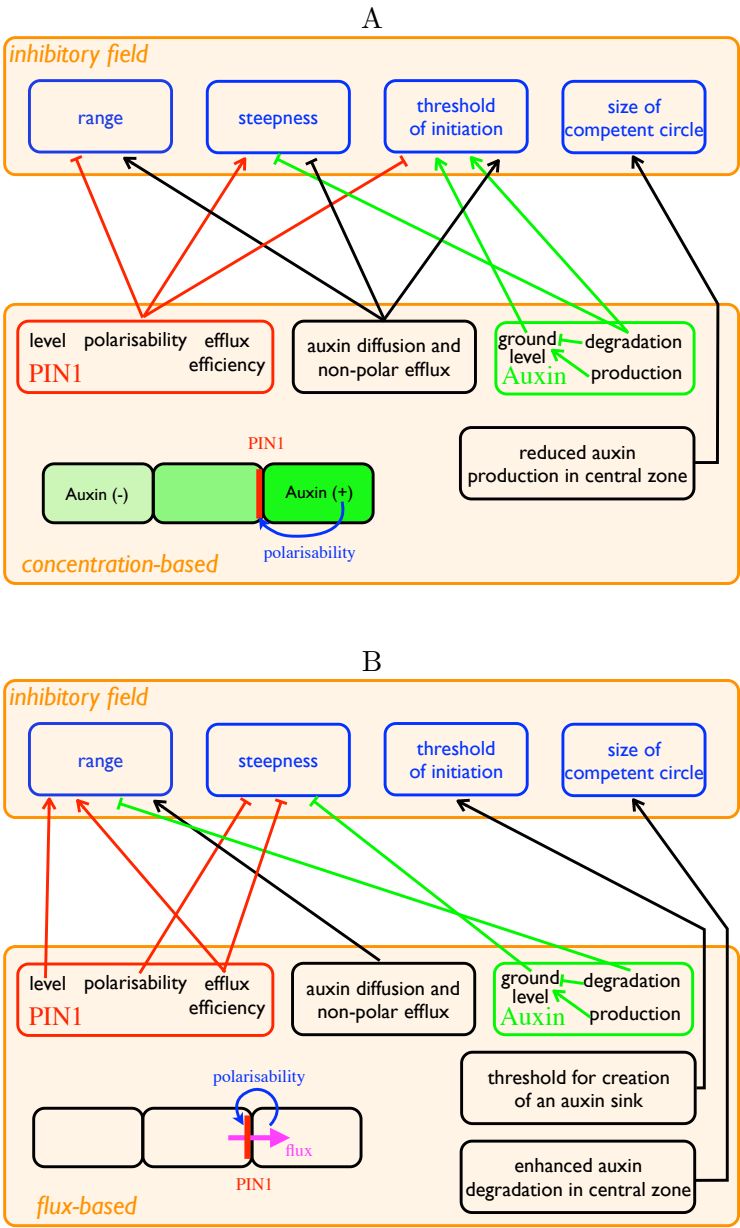

Supplement: S1 (10.1371/journal.pcbi.1002389.s001) [file journal.pcbi.1002389.s001]
