# Supplementary material for: Noise and Robustness in Phyllotaxis
Source: PLOS journal article supplement (doi:10.1371/journal.pcbi.1002389), 2012-02-16
Supplement: S9 (10.1371/journal.pcbi.1002389.s009) [file journal.pcbi.1002389.s009]

301 Moved Permanently

# Moved Permanently

The document has moved here.

---

Apache Server at www.ploscompbiol.org Port 80
